# Supplementary material for: Genetic identification and characterization of chromosomal regions for kernel length and width increase from tetraploid wheat
Source: Research Square preprint supplement (doi:10.21203/rs.3.rs-397027/v1), 2021-04-26
Supplement: Supplementary file 1 [file b0b1547964599de91c1571d3.xlsx]

## Sheet: sheet1
Table S2 Environmental information of examined agronomic traits.
Traits	Environments
KL	2017CZ	2018CZ	2019CZ	2020CZ	2020WJ	2020YA
KW	2017CZ	2018CZ	2019CZ	2020CZ	2020WJ	2020YA
SL	2017CZ	2018CZ	2019CZ	2020CZ	2020WJ	2020YA
ETN	2017CZ	2018CZ	2019CZ	2020CZ	2020WJ	N
UIL	N	N	2019CZ	2020CZ	2020WJ	N
TKW	N	N	2019CZ	2020CZ	2020WJ	2020YA
GNS	N	N	2019CZ	2020CZ	2020WJ	2020YA
FLL	2017CZ	2018CZ	2019CZ	2020CZ	N	N
FLW	2017CZ	2018CZ	2019CZ	2020CZ	N	N
Note: KL: kernel lenth; KW: kernel width; SL: spike length; ETN: effective tiller number;
UIL: length of uppermost internode; TKW: 1,000-kernel weight; GNS: grain number per spike;
FLL and FLW: flag leaf length and width; CZ: Chongzhou; WJ: Wenjiang; YA: Ya’an;
N: No data.
