# Supplementary material for: Genetic identification and characterization of chromosomal regions for kernel length and width increase from tetraploid wheat
Source: Research Square preprint supplement (doi:10.21203/rs.3.rs-397027/v1), 2021-04-26
Supplement: Supplementary file 2 [file b49802ff63ae37fbf9c408c8.xlsx]

## Sheet: sheet1
Table S3 Details of KASP primers used in this study.
Trait	Primer	Sequence (5′‑3′)	Annealing temperature	Description
KL	AX-111112626F	GAAGGTGACCAAGTTCATGCTCGCTTCCTCCCCCTCCCCCC	65 °C	validation
	AX-111112626H	GAAGGTCGGAGTCAACGGATTCGCTTCCTCCCCCTCCCCCT	65 °C	validation
	AX-111112626R	ATCAGTCCTGCTCATGGATT	65 °C	validation
KW	AX-108974756F	GAAGGTGACCAAGTTCATGCTATCTCTGGTGGCACATTGCA	65 °C	validation
	AX-108974756H	GAAGGTCGGAGTCAACGGATTATCTCTGGTGGCACATTGCG	65 °C	validation
	AX-108974756R	GCCATGAGTGTTCTTGGTGT	65 °C	validation
Note: KL: kernel length; KW: kernel width.
