# Supplementary material for: Genetic identification and characterization of chromosomal regions for kernel length and width increase from tetraploid wheat
Source: Research Square preprint supplement (doi:10.21203/rs.3.rs-397027/v1), 2021-04-26
Supplement: Supplementary file 3 [file e0229810b02fa90c8ef8ae7d.xlsx]

## Sheet: sheet1
Table S1 Information of two natural populations assessed in this study.
Details of 272 landraces wheat in China		Details of 300 Chinese common wheats
Material name		Material name
Chinese Spring		Sheng 172
baixiaomai		Jimai 403
hongmangbai		Jimai 585
baitumai		Gaoyou 9618
hongduomai		Bao 5168
yulincao		Shannong 01-35
baihulutou		Heng 05-6607
baimangyouzi		Luomai 9
baigedatou		W11031
dakoumai		Bao 5067
cantiaomai		Daman 77
xiaozibai		Xumai 29
kumai		LS6109
xiaobaimang		Hengguan 35
pushanbamai		Xu 11108
baitiaoyu		Henong 6119
wuhuatou		Yangao 1
youzimai		Changhan 58
tutoumai		RS804
laochushanbao		Xu 9169
lingbao925		Xinmai 2119
youmangcao		Shannong 65
dalihong		Baomai 2
zihuatou		Shannong 19
benmai		Zhengmai 7698
qumangmai		D08-6
xiaobaimai		Nongda 3432
liangganbai		Shannongda 6-8-2
baipibai		Lankaoaozao 8
baiheshangtou		Handan 05-093
yerenmao		Henong 05 (97)
xiaozihong		Zhongxin 5199
youmangcao		10X21
huomai		Xinmai 21
baihuomai		Zhongyuanzhixing
changmangbaike		Ningmaizi 28
xiaomaimang		Hengshui 4
shihuiyaohuomai		Sankecun
siqiangxiaomai		Xuke 718
nv'erhong		Shannong 11
daqimai		Huaimei 22
gouweibabaimai		Lv Han 1608
baimai39F		Fumai 5
yu'ermai		Bainong 207
laobaitiaozi		Yunhan 618
yangmai		Linyou 145
gongxianmai		Zhongmai 9
xiaohongmang		Henong 05 (9)
xuemai		Hannong 1412
xinjinyoumang		Yikemai 5
xiaozhihongmai		Shannong 981
mangmai		Taishan 4606
baimangmai		Xinong 529
xiaobaisui		Xuzhou 25
baichunmai		Kaimai 21
laohongmai		Baofeng 1082
baike		Shannongjian 25-229
xiaomai		Liangxing 99
dabaimai		Nongda 5181
baidatou		Henong 7106
shanxihong		Yuanda 1
baiqimai		Han 00-7050
xiaoqingmang		Shi00-7221
dabailing		Ji 7369
kuchebaidongmai		Shannong 22
qingxinlanmai		Bonong 6
zijingbai		Ruihua 1101
jianzituan		Zhongmai 1
xiaobaipi		Gaoyou 2018
huanghuazhu		Tainong 18
yejihong		Lumai 15
liulengmai		Lunzao 3
huoshaotian		Shannong 20
guangdezao		Shannong 10-2
erguangtou		Shi05-6678
nuopangtou		Xingmai 6
daoshuibai		Shannongda 7-9-3
baizhaoyu		Jinan 17
qingmangzi		W110095
huaqixiaomai		Shannongda 5-6-6
manghuazi		4BL-2R
baimangzi		Shannong 33
dahongpi		Yunhan 2130
daqitou		Baomai 3
zhuantoubaike		Lesson 15
hongmai		Hemai 17
xiaolihong		Yanmai 98
baisuihong		Shannong 055849
tutoubai		Shannong 17
shunshuihong		Huaimei 29
xiaoyuhua		Shannongda 6-8-4
putaomai		Aikang 58
baijiaomai		Hanmai 13
huxumai		Fengshou 60
wugongmai		Tainong 2987
jiangxizao		10H4-14
wugongbian		Huaimei 17
dabaimang		Sheng 126
dujiaqiaoxiaomai		Lifu 05
baixu		D209
baikeguangtou		W120134
chunqiumaizi		Fengdecun 1
hongkewugong		Yumai 52
xiaohongmang		Lunxuan 061
tiezhuantou		Yannong 19
xianjumai		Sheng 217
qingtianmai		Shimai 22
hongtoumai		Yunong 9901
xiyangmai		Xiaoyan 597
hongmangbai		Hengfu 9103
wugongmai		Henong 822
tiegengqing		H6756
zaoxiaomai		Hanzao 1
qiyanghongke		Sheng 119
baimangmai		Hansheng 923
heshangmai		Jingdong 17
baikeyoumang		Zhengmai 101
youmai		Jimai 30
datianquxiaomai		Changwu 134
qingyuanxiaomai		Luomai 21
huoshaomai		Nongda 3492
guchengxiaomai		Baofeng 0601
baikexiaomai		Shiluan 08-2
zaoxiaomai		Sanshumai
puningxiaomai		Tainong 9862
zhangmuxiaomai		Zhongmai 875
guangtoumai		Zhongjian 49
sanyuehuang		Xin 9535
tumai		Bao 5036
gaochan1hao		Linfeng 3
wuyangmai		Heng 4399
huangmaizi		Zhongyu 01095
yuzuiweimai		Shannong 23
youtiaomai		Shi 06-6136
dahonghua		Ligao 6
honghulubaimai		Xinmai 23
zaohuangmai		Shannongda 5-6-2
hongtiaomai		Zhongyu 01089
yupi		Kenong 3106
dahongmang		Shannongjian 6E-1-17
hongxumai		09CA034
lushanmai		D180
tuotuomai		Lumai 12
baikebai		Ji 5265
yuweimai		Taishan 21
hechuanmai		Huaihe 0615
huayangxiaomai		Sheng 125
huanghuaxiaomai		Sheng 183
guangguangtou		Handan 6172
baikejiang		Xinong 979
baihulutou		Bainong 160
hongmangmaizi		BN12
zaodongmai		Heng 6632
yicuomao		Huaimei 28
baimaier		Jimai 21
baikexuxusanyuehuang		Yong 4896
yuqiumai		Demai 1201
caoxiepian		Jinmai 47
dabaimai		Luohan 7
huimai		Keyi 10-6140
guangtoumai		Shiluan 02
hongmangmai		Shannongda 6-7-8
liulengmai		Nongda 179
tiekemai		Henong 7069
zimai		Chang 6878
yangmaizi		Bodan 30
erdaomei		Jimai 24
xiaobaipi		Ke 16
xiaomangmai		Yunong 201
baiyuhua		Yangao 21
nanjinghuang		Ruiquanmai 168
zhenjiang3-96		Bao 5108
heshangmai		Tianhe 3
guangtoumai		Huaimei 30
baisuizi		Shixin 733
yejihong		Jingmai 989
changshamai		Sheng 232
baimai		Jinan 8
zhuganqing		Jinghe 91-P39
zhuganqing		Ke 0801
xiaoganmai		Han 06-5170
caoxieban		Shannong 20-1
yangmai		Lumai 1
baimanghong		Henong 4198
tiezimai		Zhongmai 349
quanmangxiaomai		Shengtian 69
xishuibagutao		Henong 6331
zimai		Lumai 23
wugongmai		Chang 4640
wugongxu		Wen 0418
baikeheshangmai		Lumai 16
baiyuxiaomai		Wunong 6
gaoshanzaoshuxiaomai		Xumai 30
zhaonixiaomai		Taishan 5
ranriwumangmai		Baomaipin 8
qianqianmai		Jimai 2
guangtoubaikemai		Henong 583
huakemai		Jimai 4
xiaohongmai		Heng 71-3
shanyangxue		Keyi 11-6072
baixianmang		RS53
bailanmai		Shi 4185
baiwugongcao		Henghe 1
baijiantiao		Jinuo 200
youmangshangeda		Henong 06
cantiaomai		Lian 0809
pushanba		Luo 23
deguolan		Jinhe 8431
hongmaomai		Sheng 219
xiaohongmai(babao)		Shannong 21
xiaohongmai		Ji 729
galaohan		Jinmai 63
lanmai		Ping'an 9
baishanmai		Yujiao 6
wangkamai		Wanmai 53
wumangbaimai		Lunxuan 24
zharenmabu		Weilai 0818
zharenzhuoma		Henong 825
zhaguogouqumai		Shannongjian 38-498
zhana		Huaimei 18
louguding		11CA26
maoyinmai		Xuke 316
changmangmaoyinmai		Baomai 8
changmangpeizhuo		Shaanmai 159
renbuchun		Mingtian 0402
rendachangguangmai		Shannong 12
qimai		Shixin 616
jiachazharenzhuoma		Jinan 13
jiachashumai		Xinmai 19
jidingwumangchun		Xiaoyan 22
jinbaoyu		Xu 10054
quxiajizhuo		Baofeng 2018
suzhuozhuoma		Xuzhou 24
banmangmai		Jund2016
bomizamai-5		Jinmai 30
zedangzaxiaomai		Jinmai 33
dingrichangmang		Yannong 25
wumangxiaomai		Xinong 889
bo’erqing		Zhongmai 175
xiaohongmang		Baomai 12-6
molengmai		Heng 95 Guan 26
shenggexiaomai		Tanmai 98
zhaxigangzhuo		Tainong 9236
jigupizhuo		Shannong 55843
dadangzhuo		Nongda 189
henanbai		Shiluan 02-1
yigongzhuo		D45
bomiduanqu		Guomai 301
tajizhuo		Luomai 24
pumanghongmai		Jimai 325
tarongzhuo		Linzi 217
hongmangxiaomai		Zhongmai 12
fanshenzhuo		Lumai 22
laobaimai		Jinmai 31
youmangyangmai		Shaan 253
hongtuzi		Yunhan 20410
xiaogongxian		Zhongxin 78
baishamai		Wan 50
huangshuibai		Zhoumai 16
xiaobiansui		TAM107
baitutou		Jinmai 54
banjiemangdabai		JInboshi 731
mazhatoumai		Shi03-5285
hongmanghongmai		Gaoyou 9908
baikumai		Jinmai 70
daqingmang		Huaimei 33
baikangyangmai		Luoma 05095
hongheshang		Le 639
yejiling		Yan 2070
shidaosankemang		Xinmai 3
xiaohongmangliangmai		Bao 5113
piaoxiao		Shi05-7388
		Chang 4738
		Cangmai 6005
		Huapei 1
		Afu
		Shannongjian 14-20
		Zhou Mai 28
		Heng 05-4444
		Keyu 16
		Jimai 19
		Chang 6135
		Shunmai 1718
		Tianmin 198
		Yujiao 5
		Lian 0756
		Xinmai 18
		Zhoumai 19
		Zhengmai103
		Xinong 1376
		Yannong 999
		Ping'an 7
		Henong 06 (159)
		Hanmai 9
		Heng 7228
		Jinmai 24
		Shannongjian 41-560
		Jimai 22
		Keyu 11
		Nongda 399
