# Supplementary material for: Genetic identification and characterization of chromosomal regions for kernel length and width increase from tetraploid wheat
Source: Research Square preprint supplement (doi:10.21203/rs.3.rs-397027/v1), 2021-04-26
Supplement: Supplementary file 4 [file eb813ac09ff3573d5d69aec7.xlsx]

## Sheet: sheet1
Table S5 Comparison of QKL.sicau-AM-3B, QKW.sicau-AM-4B with previous reported quantitative trait loci (QTL) or marker-trait associations (MTAs) for kernel length (KL) and width (KW).
QTL	Chromosome arm	Left marker information			Right marker information		Reference
		Marker ID	Physical position		Marker ID	Physical position
QKL.sicau-AM-3B	3BL	AX-111112626	655.4 Mb		AX-110375013	675.6 Mb	This study
qKL.3B	3BS	Xwmc754	14.4 Mb		*	*	Chen W, Sun D, Yan X, Li R, Jing R (2019) QTL analysis of wheat kernel traits, and genetic effects of qKW-6A on kernel width. Euphytica 215
QKL.ndsu.3B	3BL	Kukri_C41129_344	203.6 Mb		BS00030651_51	217.0 Mb	Kumar A, Mantovani EE, Seetan R, Soltani A, Echeverry-Solarte M, Jain S, Simsek S, Doehlert D, Alamri MS, Elias EM (2016) Dissection of genetic factors underlying wheat kernel shape and size in an elite x nonadapted cross using a high density SNP linkage map). The Plant Genome 9:1
QKL.ndsu.3B.1	3BL	Wsnp_Ex_c57007_58898157	192.1 Mb		Tdurum_contig46030_580	214.8 Mb	Kumar A, Mantovani EE, Seetan R, Soltani A, Echeverry-Solarte M, Jain S, Simsek S, Doehlert D, Alamri MS, Elias EM (2016) Dissection of genetic factors underlying wheat kernel shape and size in an elite x nonadapted cross using a high density SNP linkage map). The Plant Genome 9:1
QGl.ccsu-3B.1	3BS	Xgwm376	38.9 Mb		Xgwm566	77.7 Mb	Tyagi S, Mir RR, Balyan HS, Gupta PK (2015) Interval mapping and meta-QTL analysis of grain traits in common wheat ( Triticum aestivum L.). Euphytica 201:367-380
QGl-3B.1	3BS	S-1122286	47.7 Mb		S-1007283	47.8 Mb	Zhang GZ (2014) Construction of High Density Genetic Map and QTL Analysis for Yield, spike and Grain Size Traits in Wheat (Chinese). Journal of Shandong Agricultural University
QKW.sicau-AM-4B	4BL	AX-108974756	433.7 Mb		AX-110915030	463.2 Mb	This study
qKW4B-1	4BL	Xwmc47	644.9 Mb		Xcfd22	673.6 Mb	Xin F, Zhu T, Wei S, Han Y, Zhao Y, Zhang D, Ma L, Ding Q (2020) QTL Mapping of Kernel Traits and Validation of a Major QTL for Kernel Length-Width Ratio Using SNP and Bulked Segregant Analysis in Wheat. Scientific Reports 10:1-12
qKW-4B	4BL	*	*		Xwmc657	513.4 Mb	Chen W, Sun D, Yan X, Li R, Jing R (2019) QTL analysis of wheat kernel traits, and genetic effects of qKW-6A on kernel width. Euphytica 215
QKw-4B.2	4BS	Xbarc199	67.7 Mb		Xmag2055	87.2 Mb	Cui F, Fan X, Chen M, Zhang N, Zhao C, Zhang W, Han J, Ji J, Zhao X, Yang L, Zhao Z, Tong Y, Wang T, Li J (2016) QTL detection for wheat kernel size and quality and the responses of these traits to low nitrogen stress. Theoretical and Applied Genetics 129:469-484
Size width 2011	4BS	Tdurum_contig64772_417	23.8 Mb		Tdurum_contig51688_681	28.0 Mb	Russo MA, Ficco DBM, Laido G, Marone D, Papa R, Blanco A, Gadaleta A, De Vita P, Mastrangelo AM (2014) A dense durum wheat × T. dicoccum linkage map based on SNP markers for the study of seed morphology. Molecular Breeding 34:1579-1597
kw-WY-4B-1.2	4BS	Xcau8.1	11.7 Mb		Xgwm495	34.8 Mb	Cui FA, Ding A, Li JUN, Zhao C, Li X, Feng D, Wang X, Wang LIN, Gao J, Wang H (2011) Wheat kernel dimensions: how do they contribute to kernel weight at an individual QTL level? Journal of Genetics 90:409-425
QGw-4B.1	4BS	D-1212306	10.5 Mb		D-1003776	14.6 Mb	Zhang GZ (2014) Construction of High Density Genetic Map and QTL Analysis for Yield, spike and Grain Size Traits in Wheat (Chinese). Journal of Shandong Agricultural University
QKw4B.1-7	4BS	wPt_7569	91.1 Mb		wPt_39.8	99.2 Mb	Li Q, Zhang Y, Liu T, Wang F, Liu K, Chen J, Tian J (2015) Genetic analysis of kernel weight and kernel size in wheat (Triticum aestivum L.) using unconditional and conditional QTL mapping. Molecular Breeding 35:194
QKw.ncl-4B.1	4BS	Xwmc617	15.8 Mb		Xwmc710	22.3 Mb	Ramya P, Chaubal A, Kulkarni K, Gupta L, Kadoo N, Dhaliwal HS, Chhuneja P, Lagu M, Gupt V (2010) QTL mapping of 1000-kernel weight, kernel length, and kernel width in bread wheat (Triticum aestivum L.). Journal of Applied Genetics 51:421-429
Note: * represents no maeker ID.
